# Supplementary material for: Interacting effects of graphene oxide derivatives and trace metals on freshwater brown trout (Salmo trutta L.) behaviour at different stages of development
Source: Royal Society of Chemistry journal article supplement (doi:10.1039/d2en01117d), 2023-01-01
Supplement: d2en01117d1.pdf [file d2en01117d1.pdf]

**ELECTRONIC SUPPLEMENTARY MATERIAL**

**Interacting effects of graphene oxide derivatives and trace metals on freshwater brown trout (*Salmo trutta* L.) behaviour at different stages of development**

**Tomas Makaras<sup>a\*</sup>, Živilė Jurgelėnė<sup>a</sup>, Vidas Pakštas<sup>b</sup> and Sergej Šemčuk<sup>b</sup>**

<sup>a</sup>Nature Research Centre, Akademijos Str. 2, 08412 Vilnius, Lithuania

<sup>b</sup>SRI Center for Physical Sciences and Technology, Saulėtekio Av. 3, 02300 Vilnius, Lithuania

[tomas.makaras@gamtc.lt](mailto:tomas.makaras@gamtc.lt) (T. Makaras), [zivile.jurgelene@gamtc.lt](mailto:zivile.jurgelene@gamtc.lt) (Ž. Jurgelėnė), [vidas.pakstas@ftmc.lt](mailto:vidas.pakstas@ftmc.lt) (V. Pakštas), [sergej.semчук@ftmc.lt](mailto:sergej.semчук@ftmc.lt) (S. Šemčuk)

**\*Corresponding author.** E-mail: [tomas.makaras@gamtc.lt](mailto:tomas.makaras@gamtc.lt)

## CHARACTERISATION METHODS

### *Experimental water characterisation*

The physicochemical analysis of experimental (dilution) water used in the trials is shown in Supplementary Table 1. The discrepancy in metal ion concentrations between nominal and measured concentrations in the MIX solution was in the 5–14.3 % range. As a result, the metal ion concentrations detected in the experimental water (collected in fish-holding tanks with a water re-circulating system) used for the tests (excluding  $Mn^{2+}$ ) were lower than the device detection limit. The water quality and lighting conditions under which the acclimatised fish were maintained were the same as in the experimental test. The major parameters of the water used for the experiments (pH, ORP, dissolved oxygen, and temperature) were routinely monitored with a hand-held multi-meter (HI-98196 Multi-parameter Waterproof Meter, Romania). The alkalinity, nitrates, chlorides, ammonia, and metals in the experimental water were tested in accordance with ISO standards (ISO 6332:1988; ISO 15586:2003; ISO 10304-1:2007; ISO 5814:1990; ISO 10523:2008; ISO 9963-1:1994; ISO 14911:1998). All parameters were measured with an atomic absorption spectrophotometer, Varian's SpectrAA 55, USA.

Table S1. Chemical and physical properties of experimental water and trace metals in the complex mixture

| Physico-chemical characteristics                                               |                     |                               |                  |                               |                     |                       |                                                                                                   |
|--------------------------------------------------------------------------------|---------------------|-------------------------------|------------------|-------------------------------|---------------------|-----------------------|---------------------------------------------------------------------------------------------------|
| Metals (mg L <sup>-1</sup> )                                                   |                     | Cations (mg L <sup>-1</sup> ) |                  | Anions (mg L <sup>-1</sup> )  |                     | Other analytes        |                                                                                                   |
| Dilution water (collected in fish-holding tanks with re-circulating system)    |                     |                               |                  |                               |                     |                       |                                                                                                   |
| Mn <sup>2+</sup>                                                               | 6                   | Na <sup>+</sup>               | 5.2              | Cl <sup>-</sup>               | 4.4                 | pH                    | For each experimental setting, pH, dissolved oxygen, and water temperature were noted separately. |
| Zn <sup>2+</sup>                                                               | < 0.04              | K <sup>+</sup>                | 3.8              | SO <sub>4</sub> <sup>2-</sup> | 23.1                | Temperature           |                                                                                                   |
| Cu <sup>2+</sup>                                                               | < 0.001             | Ca <sup>2+</sup>              | 68               | HCO <sub>3</sub> <sup>-</sup> | 203                 | Dissolved oxygen (DO) |                                                                                                   |
| Ni <sup>2+</sup>                                                               | < 0.002             | Mg <sup>2+</sup>              | 15               | CO <sub>3</sub> <sup>-</sup>  | 1.03                |                       |                                                                                                   |
| Cr <sup>total</sup>                                                            | < 0.001             | Fe <sup>2+</sup>              | 0.11             | NO <sub>2</sub> <sup>-</sup>  | <0.010              |                       |                                                                                                   |
| Pb <sup>2+</sup>                                                               | < 0.001             | Fe <sup>3+</sup>              | <0.01            | NO <sub>3</sub> <sup>-</sup>  | <0.050              |                       |                                                                                                   |
| Cd <sup>2+</sup>                                                               | < 0.0003            | Fe <sub>total</sub>           | 0.12             |                               |                     |                       |                                                                                                   |
|                                                                                |                     | NH <sub>4</sub> <sup>+</sup>  | 0.13             |                               |                     |                       |                                                                                                   |
| Metal concentrations (µg L <sup>-1</sup> ) in a complex mixture solution (MIX) |                     |                               |                  |                               |                     |                       |                                                                                                   |
| Solution                                                                       | Concentration value | Zn <sup>2+</sup>              | Cu <sup>2+</sup> | Ni <sup>2+</sup>              | Cr <sup>total</sup> |                       |                                                                                                   |
| MIX*                                                                           | Nominal             | 100                           | 10               | 34                            | 10                  |                       |                                                                                                   |
| MIX10**                                                                        | Nominal             | 1000                          | 100              | 340                           | 100                 |                       |                                                                                                   |
| MIX20**                                                                        | Nominal             | 2000                          | 200              | 680                           | 200                 |                       |                                                                                                   |
| MIX20**                                                                        | Measured            | 2100                          | 180              | 620                           | 180                 |                       |                                                                                                   |

< Means below the detection limit.

\*MIX (lowest tested MIX solution) represents a stock solution of a metal mixture (MIX), where the concentration of Zn, Cu, Ni, and Cr in the MIX was prepared taking into account the EQC of these metals set for European surface water bodies (Directive 2013/39/EU).

\*\*MIX10 and MIX20 represent the concentrations of each of the four metals in the prepared mixture at 10- and 20-fold increases above the maximum-allowable-concentrations (MAC) levels, respectively.

### *X-Ray Fluorescence Analysis (XRF)*

Table S2. Results of XRF analysis of average elemental chemical composition of impurities in GO samples (in weight %).

| Element      | Na    | Mg    | Al    | Si    | P     | S     | Cl    | Ca    | Fe    |
|--------------|-------|-------|-------|-------|-------|-------|-------|-------|-------|
| Conc. w. (%) | 0.012 | 0.016 | 0.024 | 0.033 | 0.025 | 0.118 | 0.090 | 0.070 | 0.018 |

### *Characterisation of larvae individuals in nests*

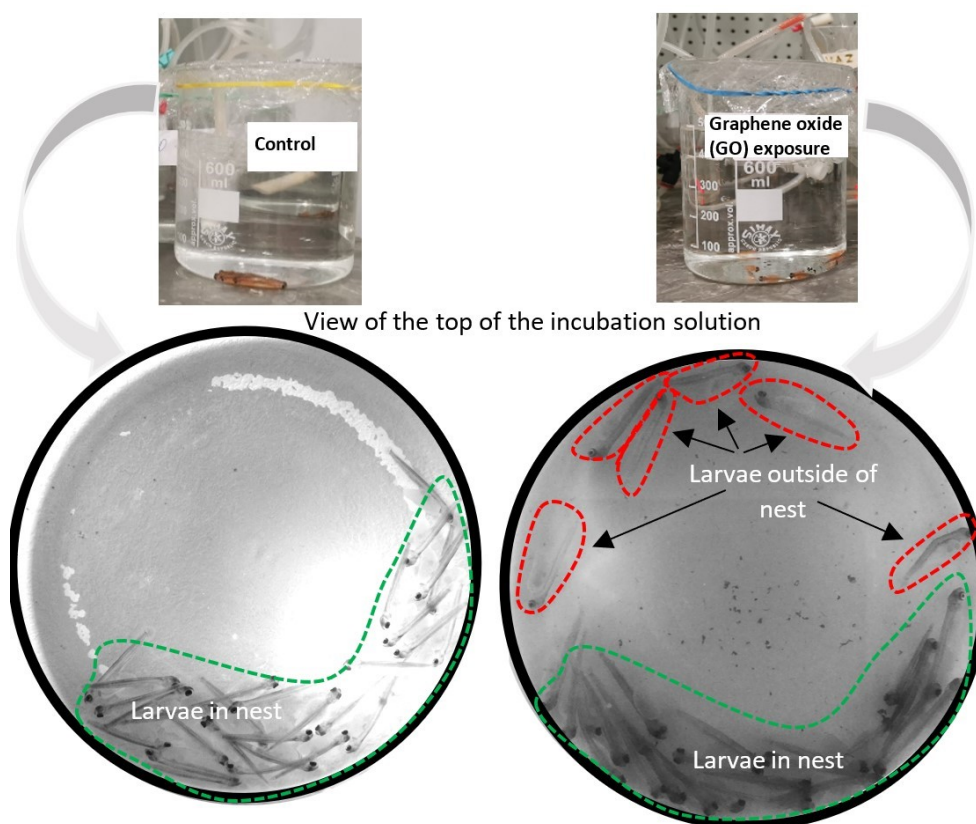

Figure S1. Differences in nesting (control) and non-nesting (treatment) behaviour of brown trout (*Salmo trutta*) larvae exposed to GO.

### Size distribution

The size distribution of synthesized GO was performed using open source programs: ImageJ (<https://imagej.nih.gov/ij/index.html>) and CellProfiler 4.2.5 (<https://cellprofiler.org/releases>).

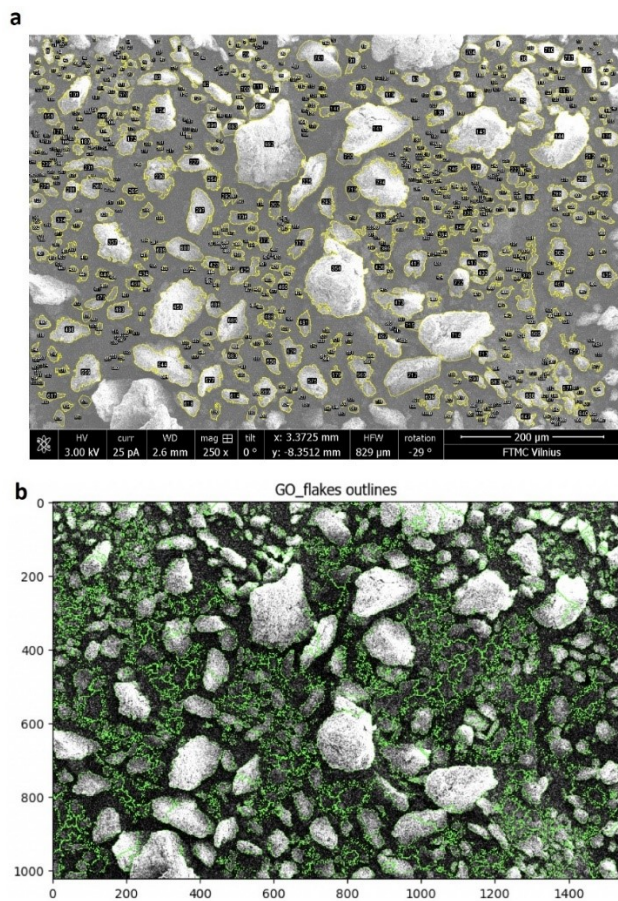

Figure S2. Analysed SEM images using (a) ImageJ and (b) CellProfiler software.

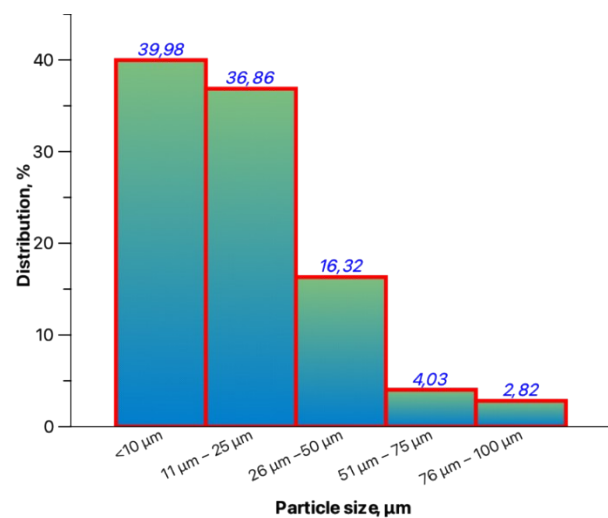

Figure S3. Size distribution of synthesised GO flakes.

### Thermogravimetric Analysis (TG/HDSC-MS)

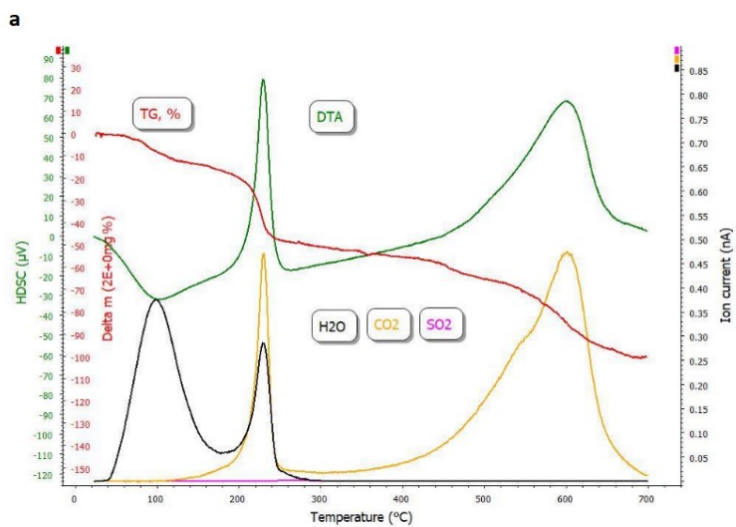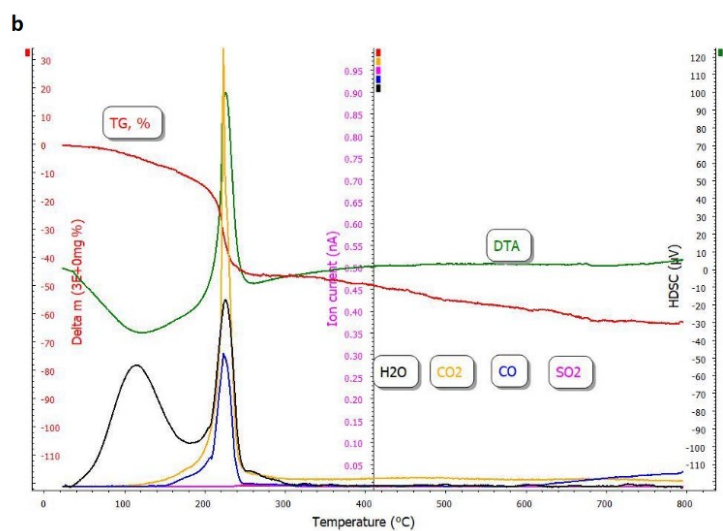

Figure S4. TGA graphs of mass loss and detected concentrations of emitted compounds using the air (a) and argon (b) atmosphere.

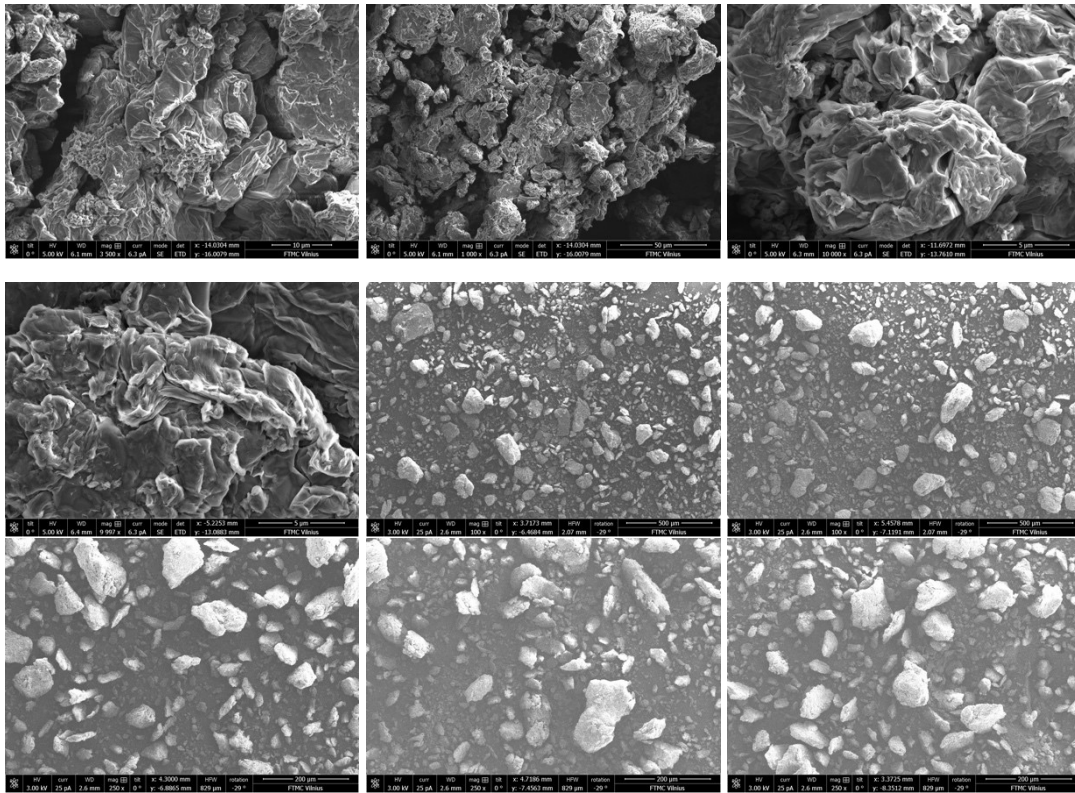

Figure S5. SEM images of GO.

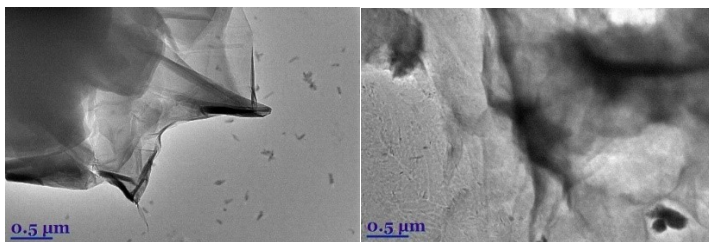

Figure S6. TEM images of GO.

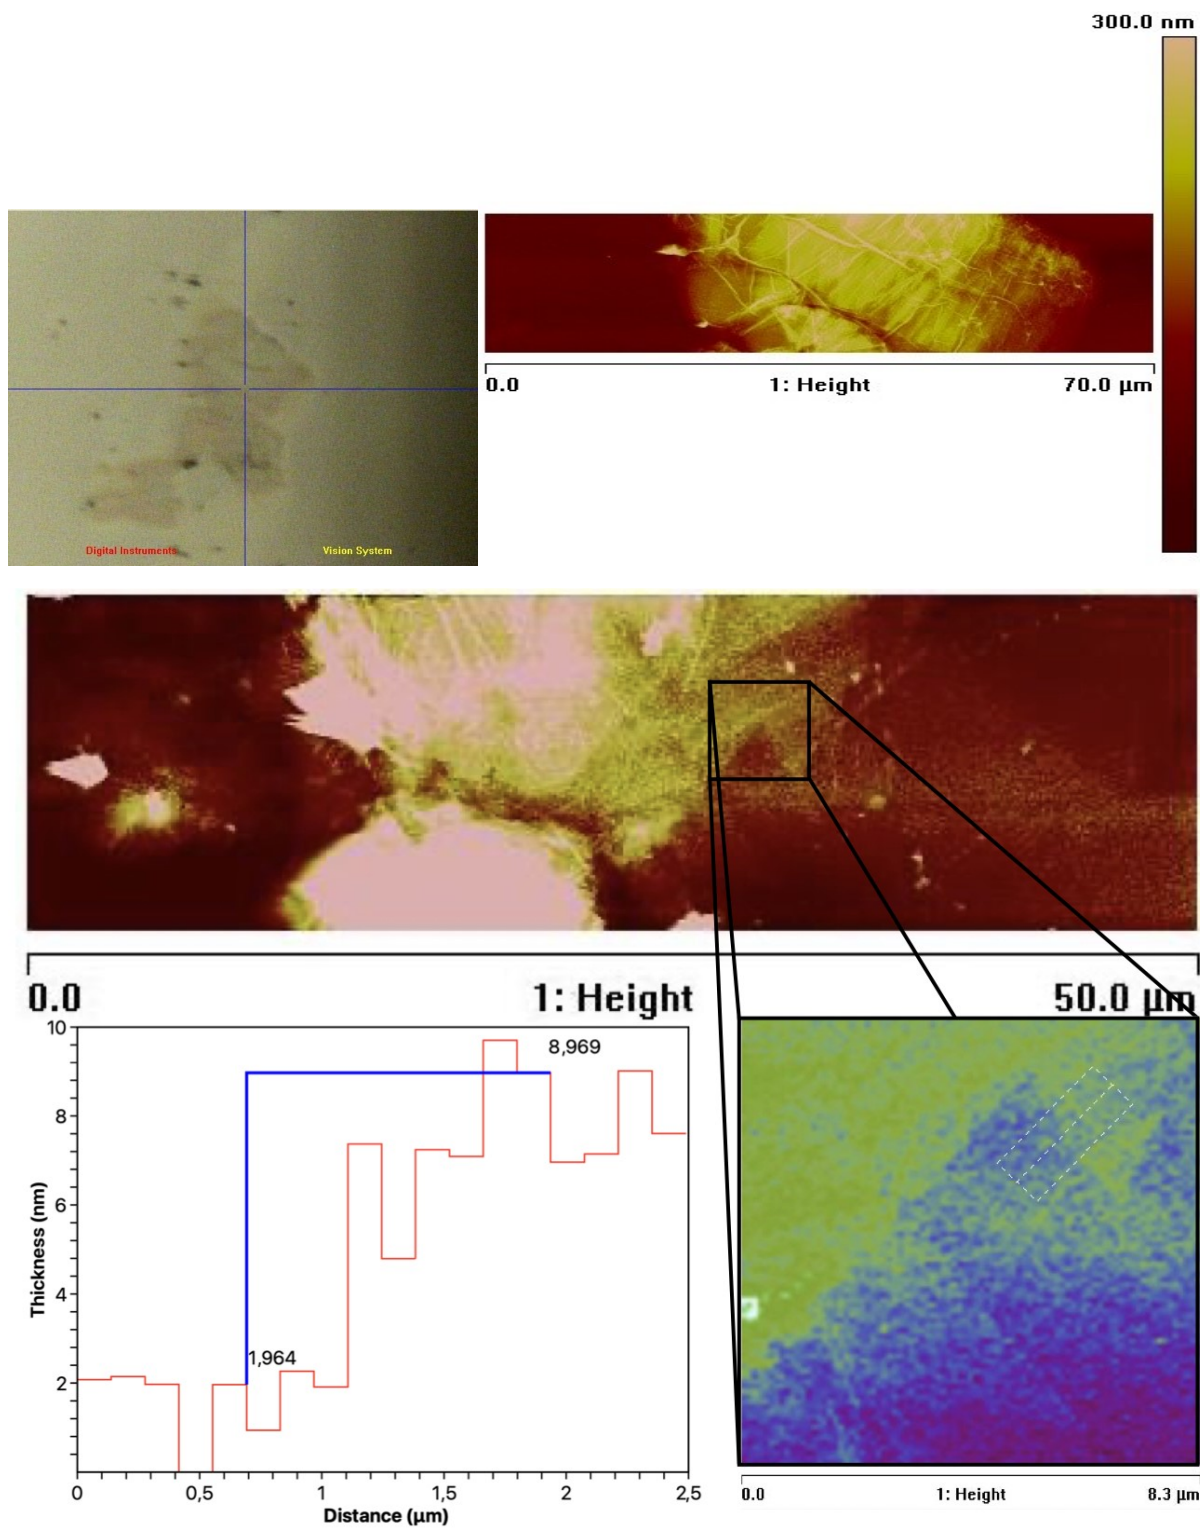

Figure S7. AFM thickness analysis of GO.
